# Supplementary material for: Development and validation of an artificial neural network prognostic model after gastrectomy for gastric carcinoma: An international multicenter cohort study
Source: PubMed Central journal article supplement (PMC7476835; doi:10.1002/cam4.3245), 2020-07-15
Supplement: CAM4-9-6205-s001.pdf [file CAM4-9-6205-s001.pdf]

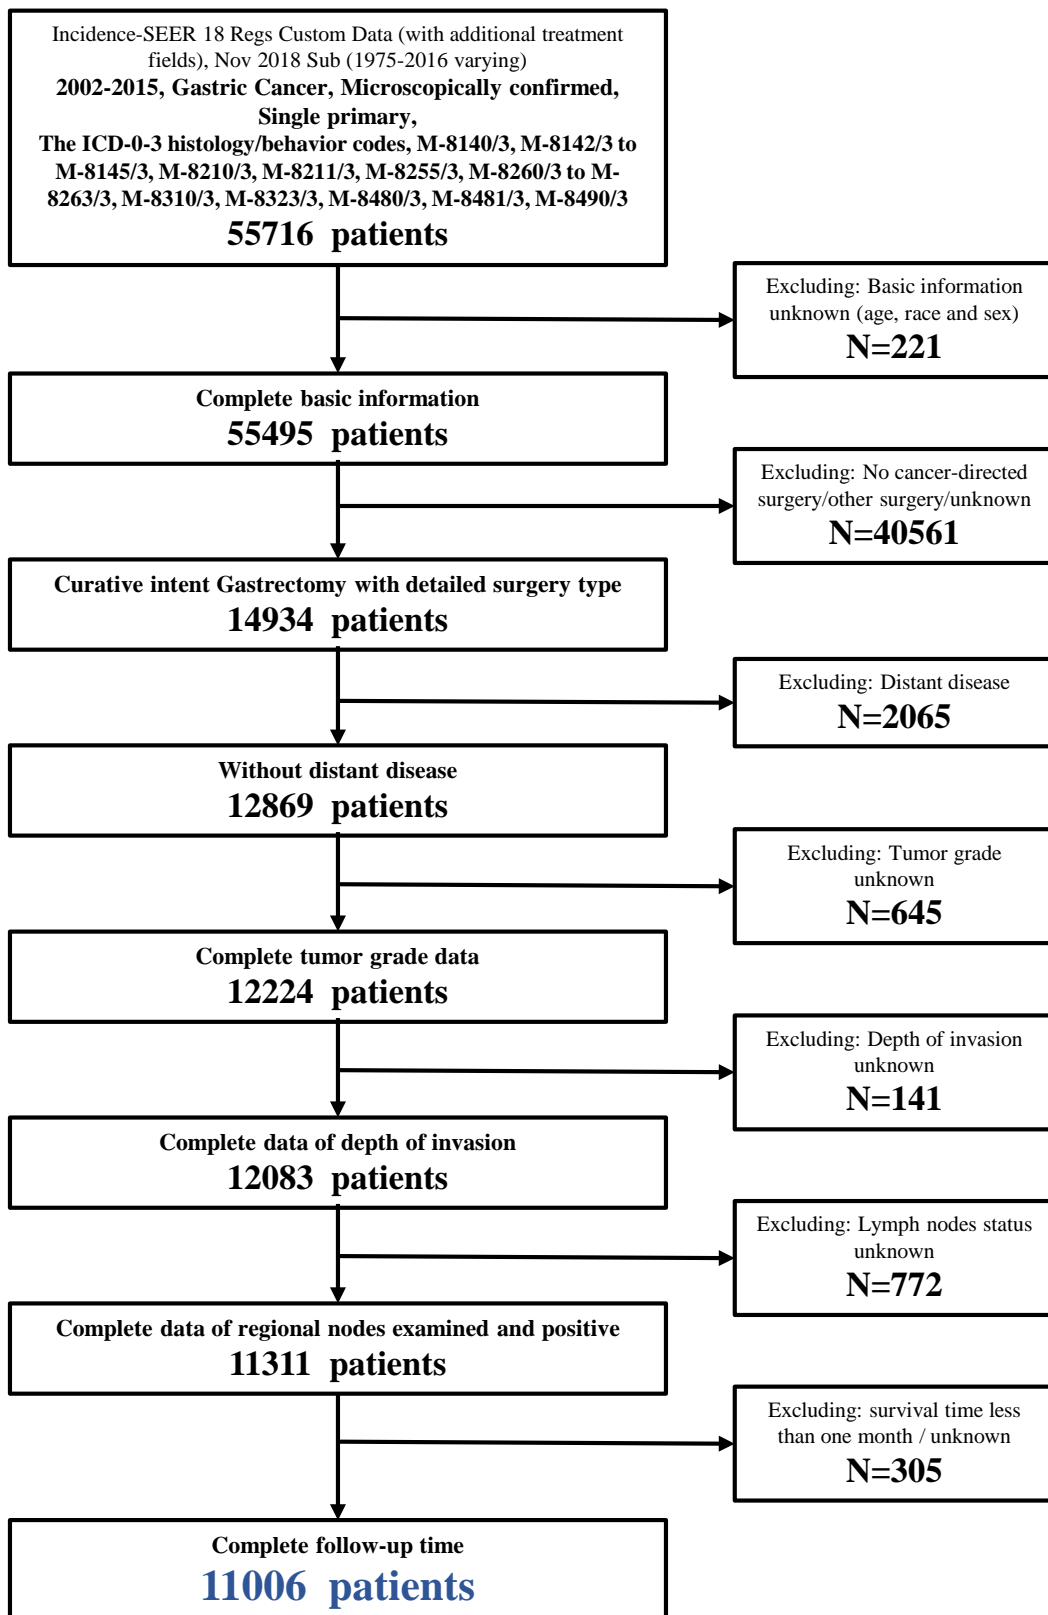

Fig. S1 Flowchart of patient selection process in the SEER cohort

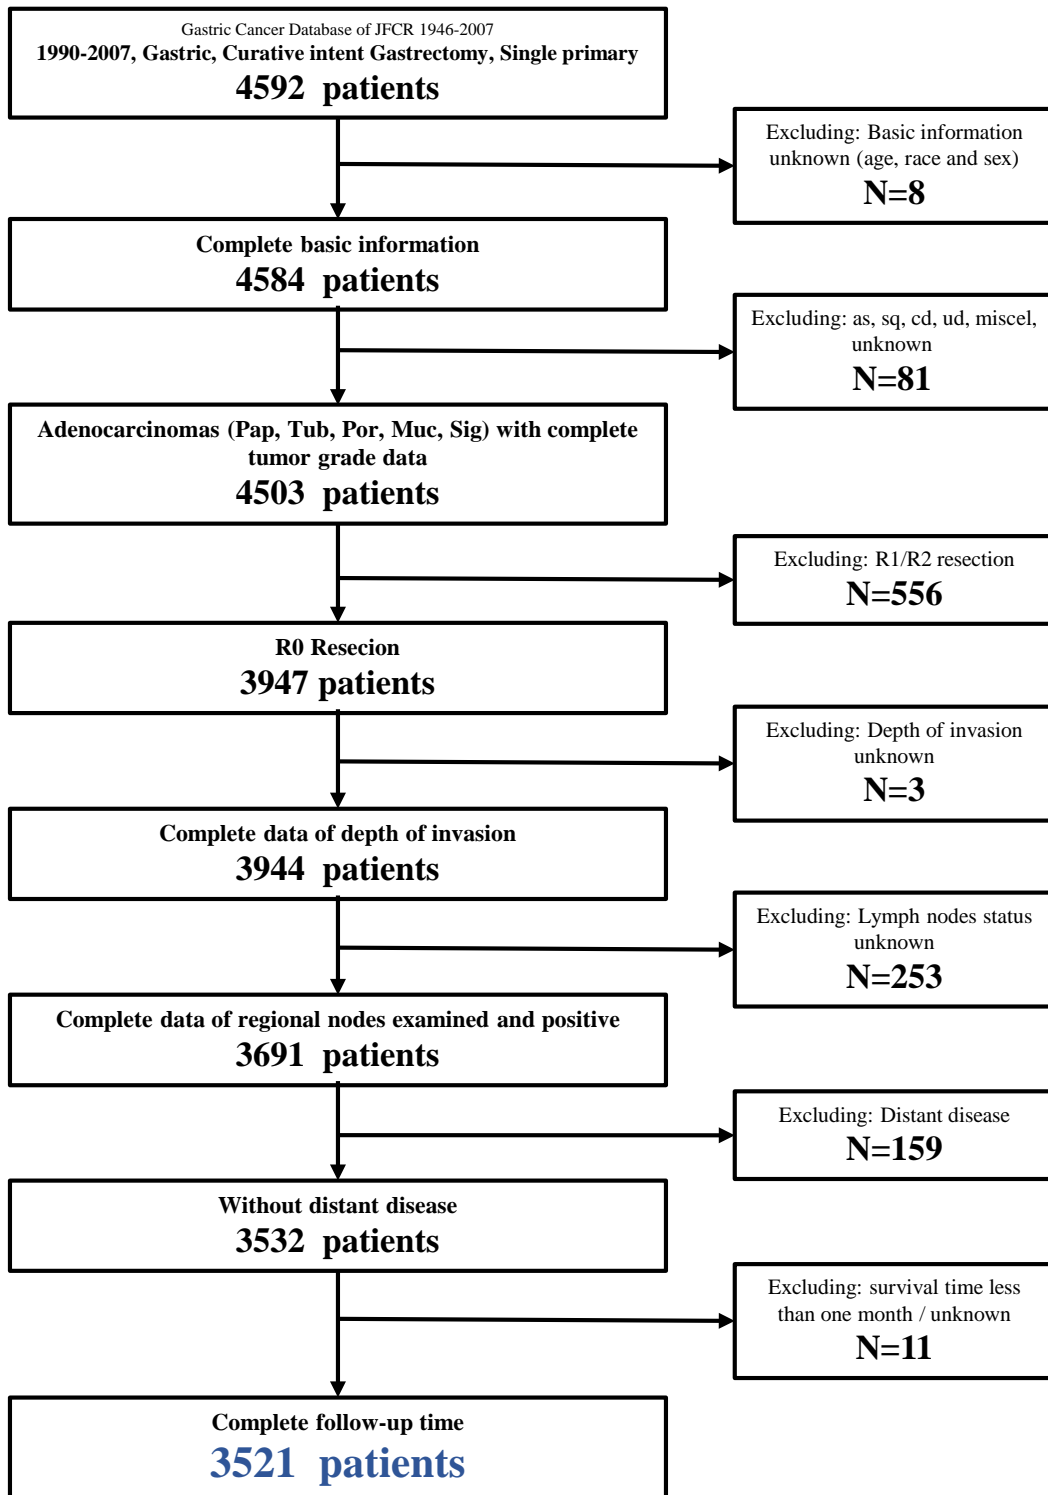

Fig. S2 Flowchart of patient selection process in the CIAH cohort

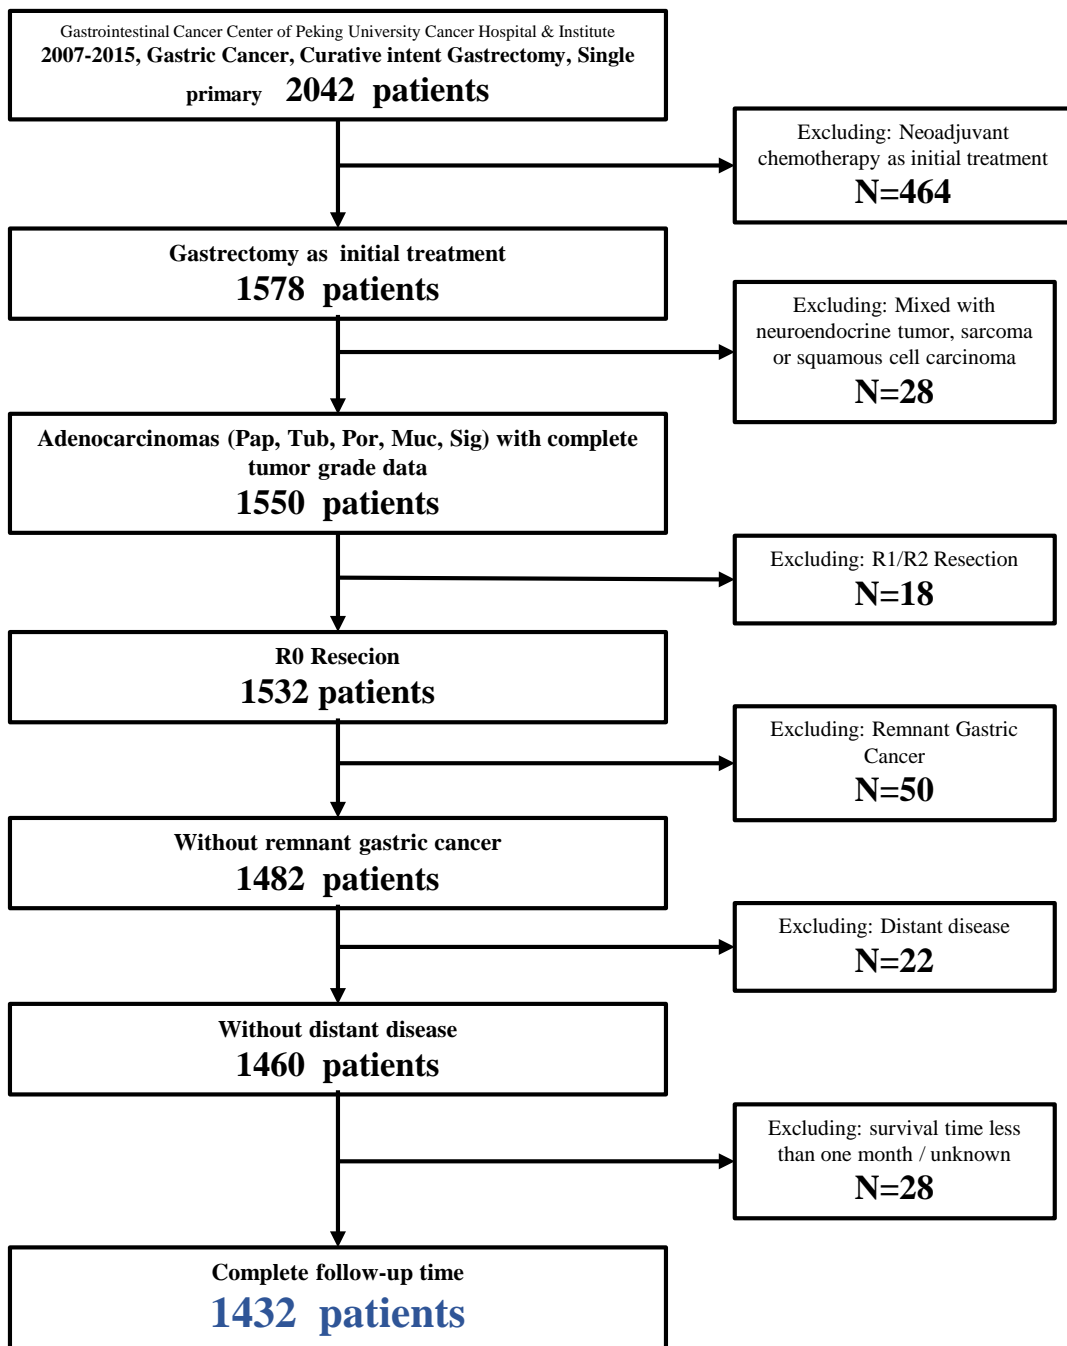

Fig. S3 Flowchart of patient selection process in the PUCHI cohort

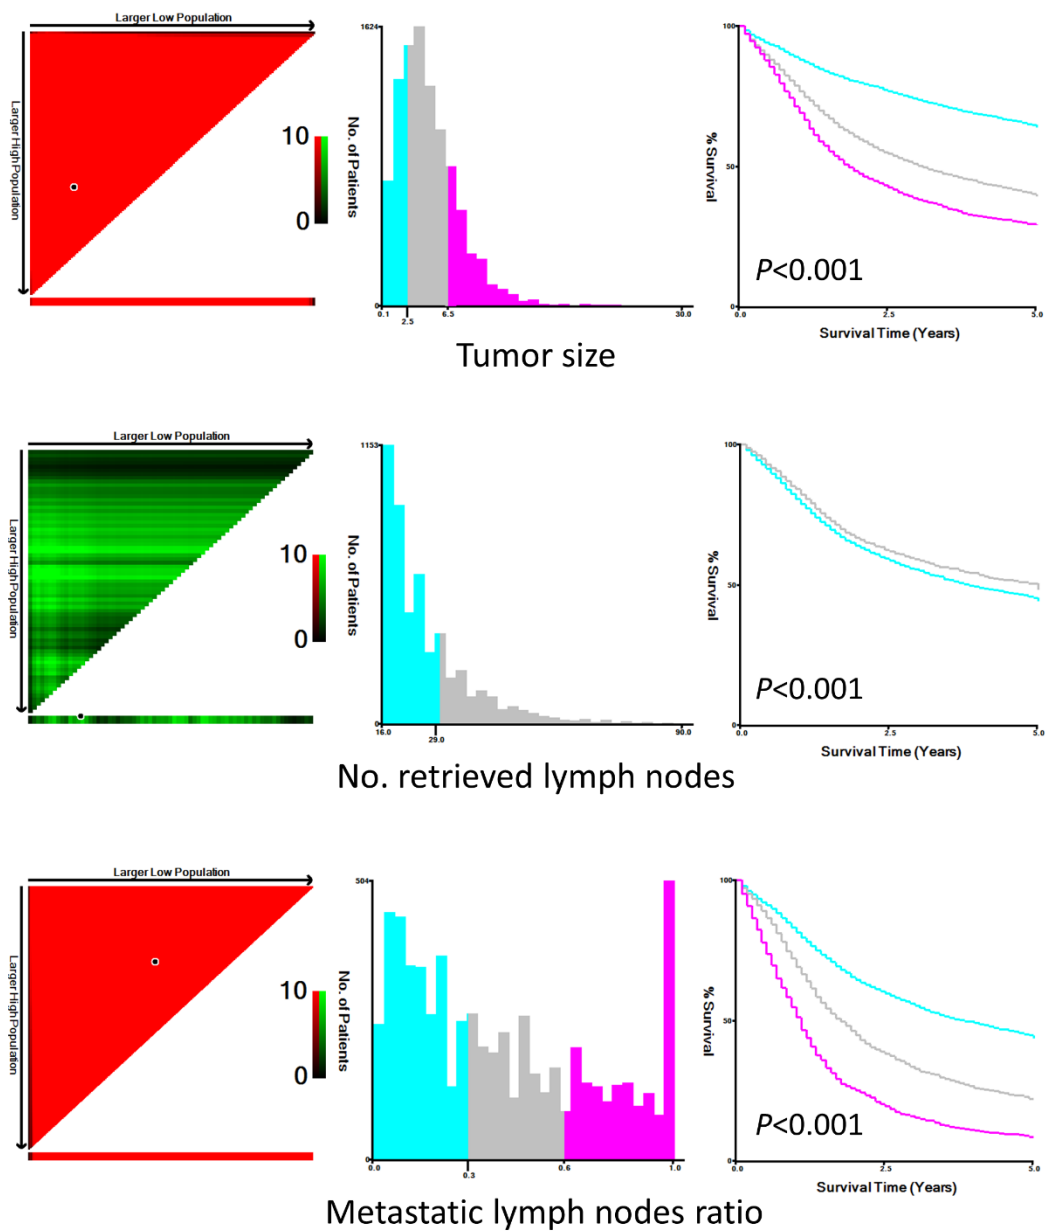

Fig. S4 X-tile analysis of the potential selected variables including tumor size, number of retrieved lymph nodes, and ratio of metastatic lymph nodes. Red coloration represent an inverse correlation with survival, whereas green coloration represents direct associations. The optimal cut-point occurs at the bright pixel (green or red).

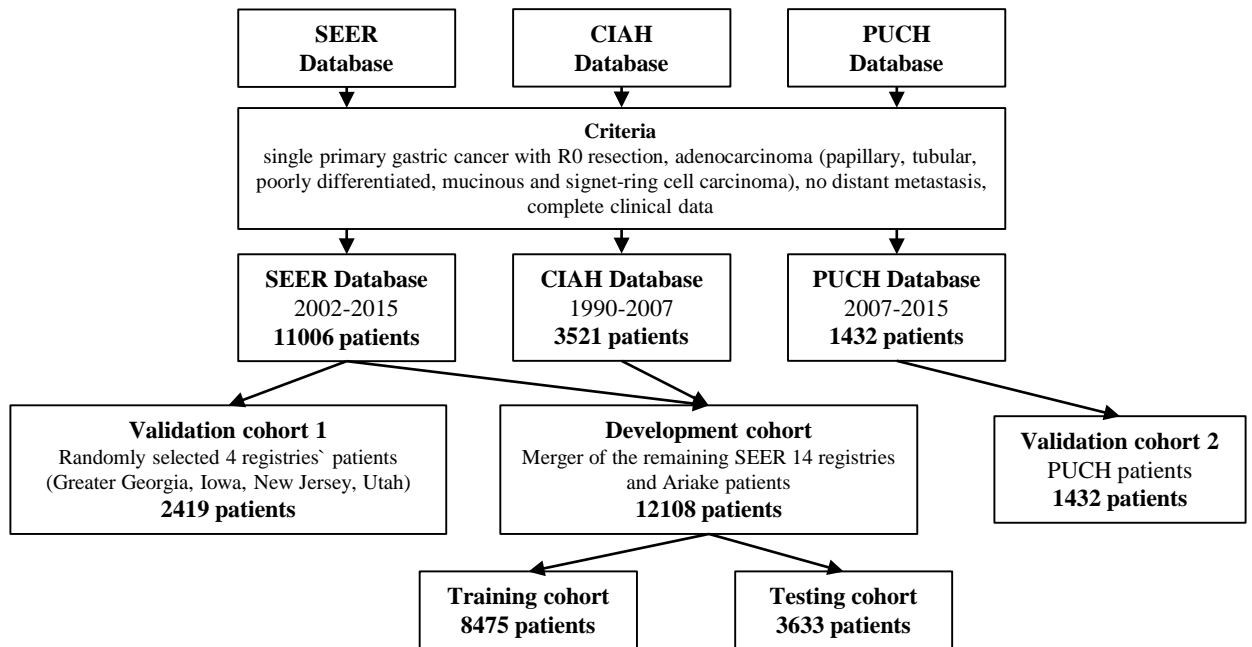

Fig. S5 Detailed grouping process for development cohort and validation cohorts

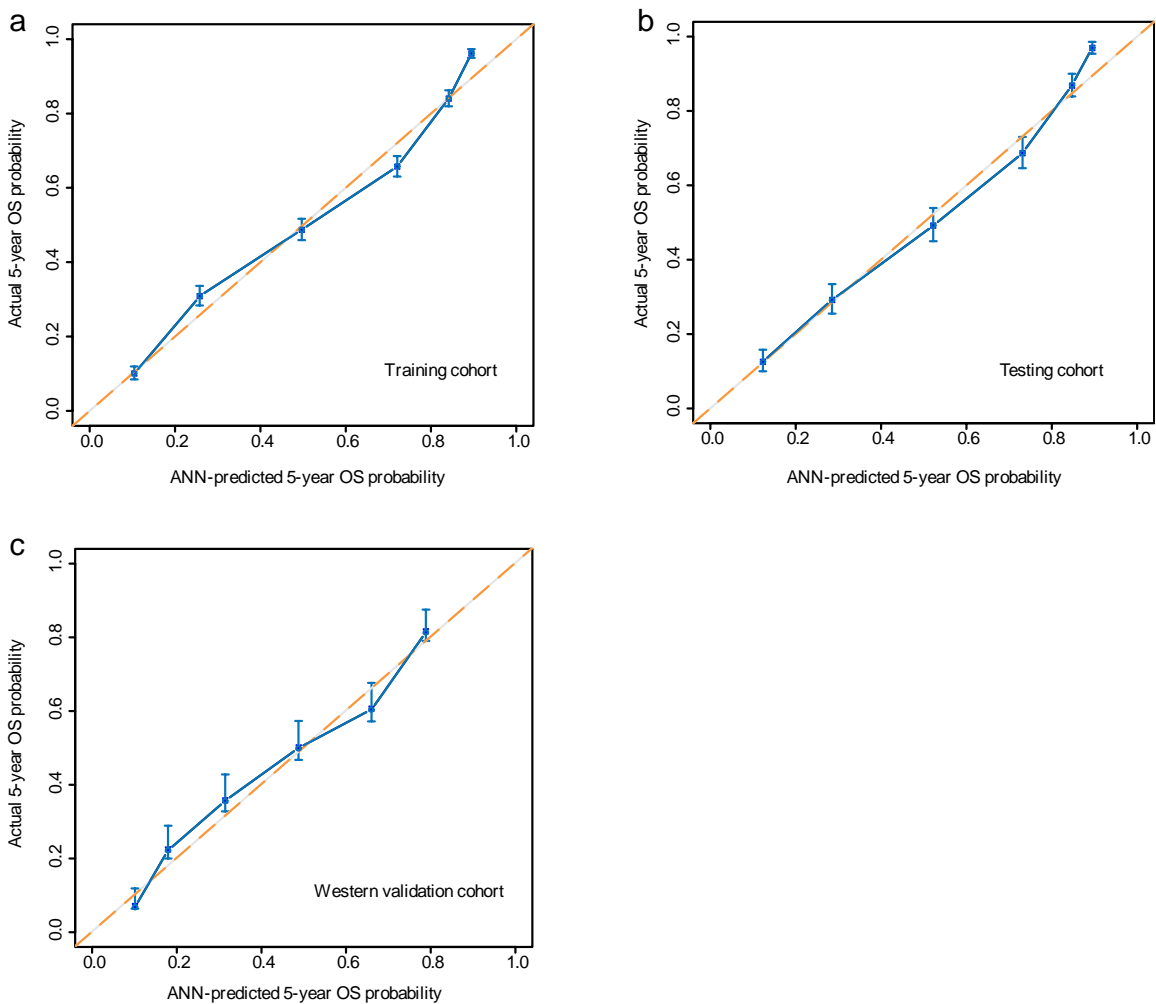

Fig. S6 Calibration of the ANN model. a. training cohort, b. testing cohort, c. Western validation cohort

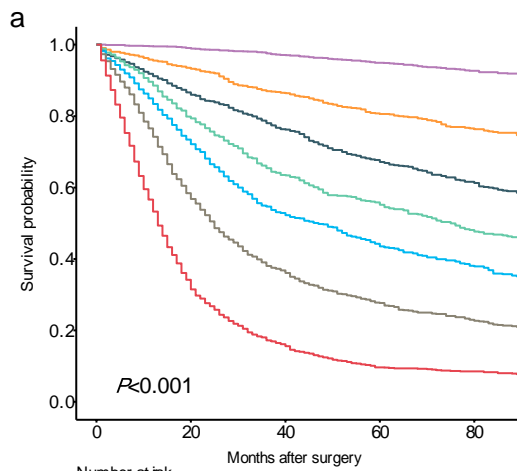

|         | Number at risk |      |      |      |     |
|---------|----------------|------|------|------|-----|
|         | 0              | 20   | 40   | 60   | 80  |
| Group A | 1778           | 1421 | 1257 | 1104 | 750 |
| Group B | 1154           | 902  | 727  | 556  | 384 |
| Group C | 1091           | 824  | 623  | 470  | 337 |
| Group D | 865            | 617  | 422  | 325  | 224 |
| Group E | 1038           | 687  | 425  | 297  | 220 |
| Group F | 1191           | 644  | 350  | 229  | 156 |
| Group G | 1358           | 438  | 178  | 91   | 69  |

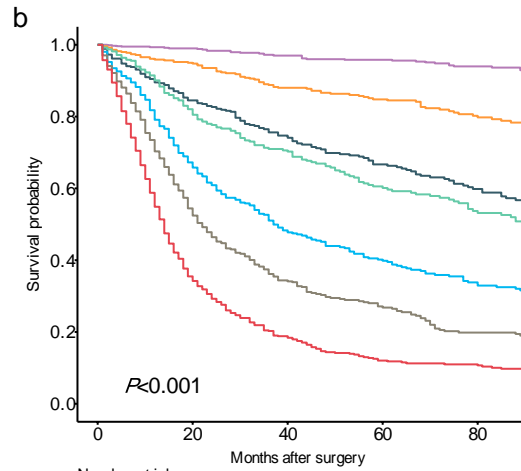

|         | Number at risk |     |     |     |     |
|---------|----------------|-----|-----|-----|-----|
|         | 0              | 20  | 40  | 60  | 80  |
| Group A | 776            | 573 | 499 | 440 | 306 |
| Group B | 508            | 403 | 332 | 269 | 179 |
| Group C | 444            | 323 | 242 | 181 | 120 |
| Group D | 387            | 263 | 194 | 139 | 97  |
| Group E | 463            | 279 | 173 | 117 | 80  |
| Group F | 474            | 239 | 133 | 89  | 52  |
| Group G | 581            | 195 | 88  | 50  | 36  |

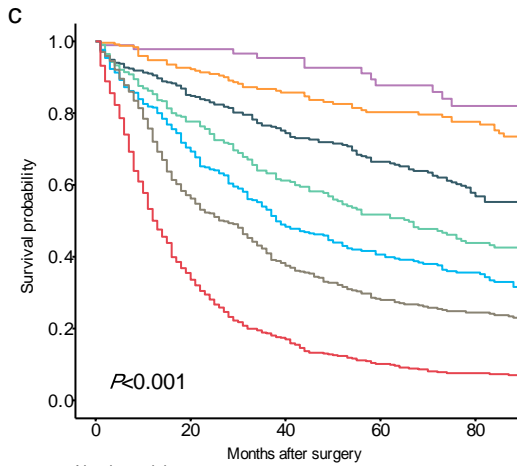

|         | Number at risk |     |     |     |     |
|---------|----------------|-----|-----|-----|-----|
|         | 0              | 20  | 40  | 60  | 80  |
| Group A | 94             | 85  | 71  | 53  | 39  |
| Group B | 252            | 214 | 168 | 135 | 108 |
| Group C | 373            | 291 | 215 | 164 | 115 |
| Group D | 317            | 230 | 147 | 106 | 73  |
| Group E | 392            | 261 | 164 | 114 | 86  |
| Group F | 443            | 240 | 142 | 95  | 69  |
| Group G | 548            | 184 | 81  | 40  | 27  |

Fig. S7 Kaplan-Meier survival curves of the ANN risk subgroups. a. training cohort, b. testing cohort, c. Western validation cohort



|                            |      |      |      |      |      |      |        |
|----------------------------|------|------|------|------|------|------|--------|
| 1-15                       | 3381 | 39.9 | 1448 | 39.9 | 1397 | 57.8 |        |
| 16-29                      | 2631 | 31   | 1140 | 31.4 | 750  | 31   |        |
| >29                        | 2463 | 29.1 | 1045 | 28.8 | 272  | 11.2 |        |
| <b>No. of mLN</b>          |      |      |      |      |      |      | <0.001 |
| 0                          | 4316 | 50.9 | 1861 | 51.2 | 1045 | 43.2 |        |
| 1-2                        | 1388 | 16.4 | 615  | 16.9 | 445  | 18.4 |        |
| 3-6                        | 1276 | 15.1 | 541  | 14.9 | 469  | 19.4 |        |
| 7-15                       | 1077 | 12.7 | 454  | 12.5 | 344  | 14.2 |        |
| >15                        | 418  | 4.9  | 162  | 4.5  | 116  | 4.8  |        |
| <b>MLR</b>                 |      |      |      |      |      |      | <0.001 |
| 0                          | 4316 | 50.9 | 1861 | 51.2 | 1045 | 43.2 |        |
| <0.32                      | 2223 | 26.2 | 952  | 26.2 | 646  | 26.7 |        |
| 0.32-0.64                  | 983  | 11.6 | 434  | 11.9 | 358  | 14.8 |        |
| >0.64                      | 953  | 11.2 | 386  | 10.6 | 370  | 15.3 |        |
| <b>Differentiation</b>     |      |      |      |      |      |      | 0.050  |
| Differentiated             | 3025 | 35.7 | 1304 | 35.9 | 802  | 35.9 |        |
| Undifferentiated           | 5450 | 64.3 | 2329 | 64.1 | 1617 | 64.1 |        |
| <b>Histology</b>           |      |      |      |      |      |      | 0.580  |
| Adenocarcinoma             | 6349 | 74.9 | 2709 | 74.6 | 1785 | 73.8 |        |
| Mucinous Adenocarcinoma    | 180  | 2.1  | 90   | 2.5  | 52   | 2.1  |        |
| Signet-ring cell carcinoma | 1946 | 23   | 834  | 23   | 582  | 24.1 |        |

---

*SEER* Surveillance, Epidemiology, and End Results, *CIAH* Cancer Institute Ariake Hospital, *rLN* retrieved lymph nodes, *mLN* metastatic lymph nodes, *MLR* metastatic lymph nodes ratio



Table S2 ANN variable corresponding codes

| Variables           | Code | Value                   |
|---------------------|------|-------------------------|
| Hospital_volume     | 0    | low                     |
|                     | 1    | high                    |
| Age                 | 1    | <41                     |
|                     | 2    | 41-60                   |
|                     | 3    | 61-70                   |
|                     | 4    | >70                     |
| Race                | 1    | Non-Latino-White        |
|                     | 2    | Latino-White            |
|                     | 3    | Black                   |
|                     | 4    | Chinese+Japanese+Korea  |
|                     | 5    | Others                  |
| Gastrectomy_type    | 0    | subtotal                |
|                     | 1    | total                   |
| Tumor_size          | 1    | <2.6                    |
|                     | 2    | 2.6-6.6                 |
|                     | 3    | >6.6                    |
|                     | 4    | diffuse                 |
|                     | 5    | Unknown                 |
| Depth_of_invasion   | 1    | Mucosa and Submucosa    |
|                     | 2    | Proper muscle           |
|                     | 3    | Subserosa               |
|                     | 4    | Serosa                  |
|                     | 5    | Adjacent organ invasion |
| No.metastatic_LN    | 0    | 0                       |
|                     | 1    | 1-2                     |
|                     | 2    | 3-6                     |
|                     | 3    | 7-15                    |
|                     | 4    | >15                     |
| No.retrieved_LN     | 1    | 1-15                    |
|                     | 2    | 16-29                   |
|                     | 3    | $\geq 30$               |
| metastatic_LN_ratio | 0    | 0                       |
|                     | 1    | <0.32                   |
|                     | 2    | 0.32-0.64               |
|                     | 3    | $\geq 0.64$             |
